# Supplementary material
Source: publisher site journal article supplement (https://www.dovepress.com/article/438758)
Supplement: Supplementary file 1 [file get_supplementary_file.php]

**Supplementary Figures**

**
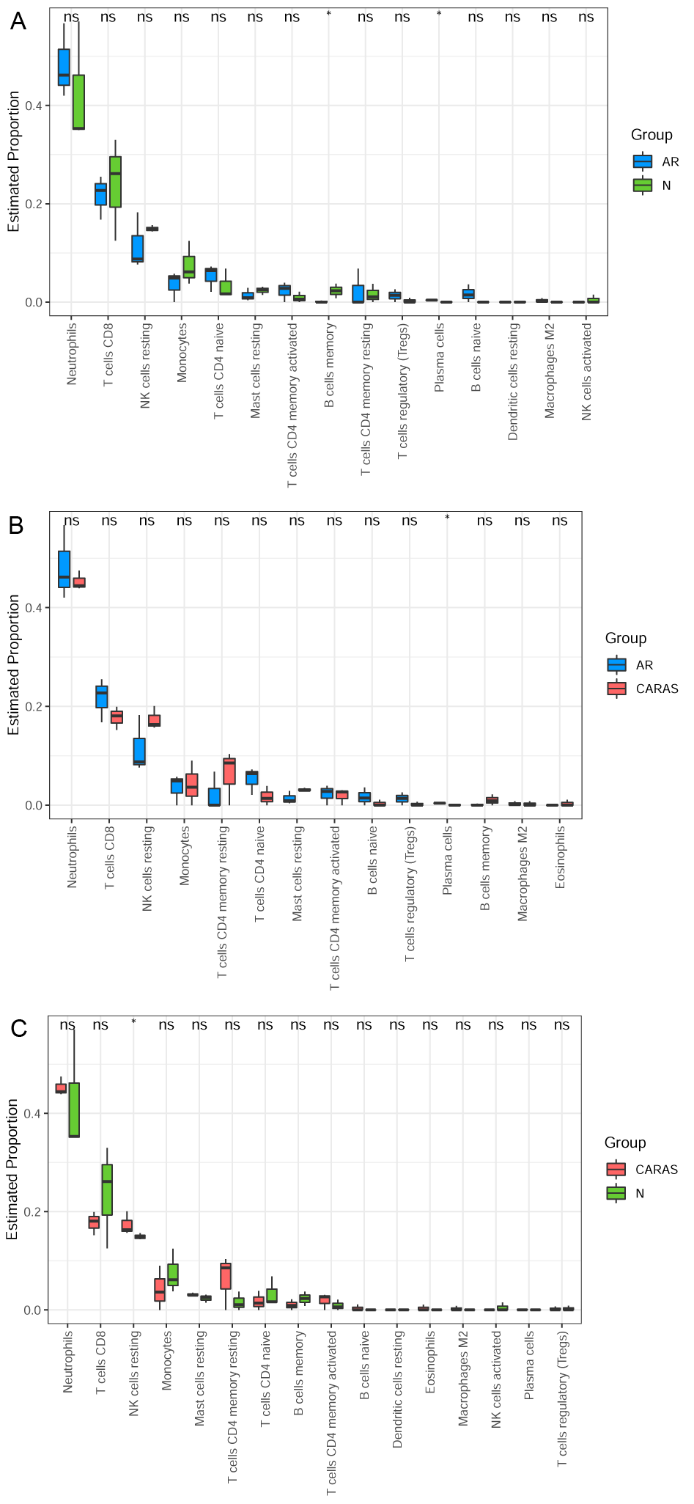
**

**Figure S1** Immune infiltration in AR vs. N (A), CARAS vs. N (B) and CARAS vs. AR groups (C).

AR, allergic rhinitis; N, healthy controls; CARAS, combined allergic rhinitis and asthma syndrome. Kruskal-Wallis test was used for statistical analysis. *p < 0.05, ns: not significant.

**
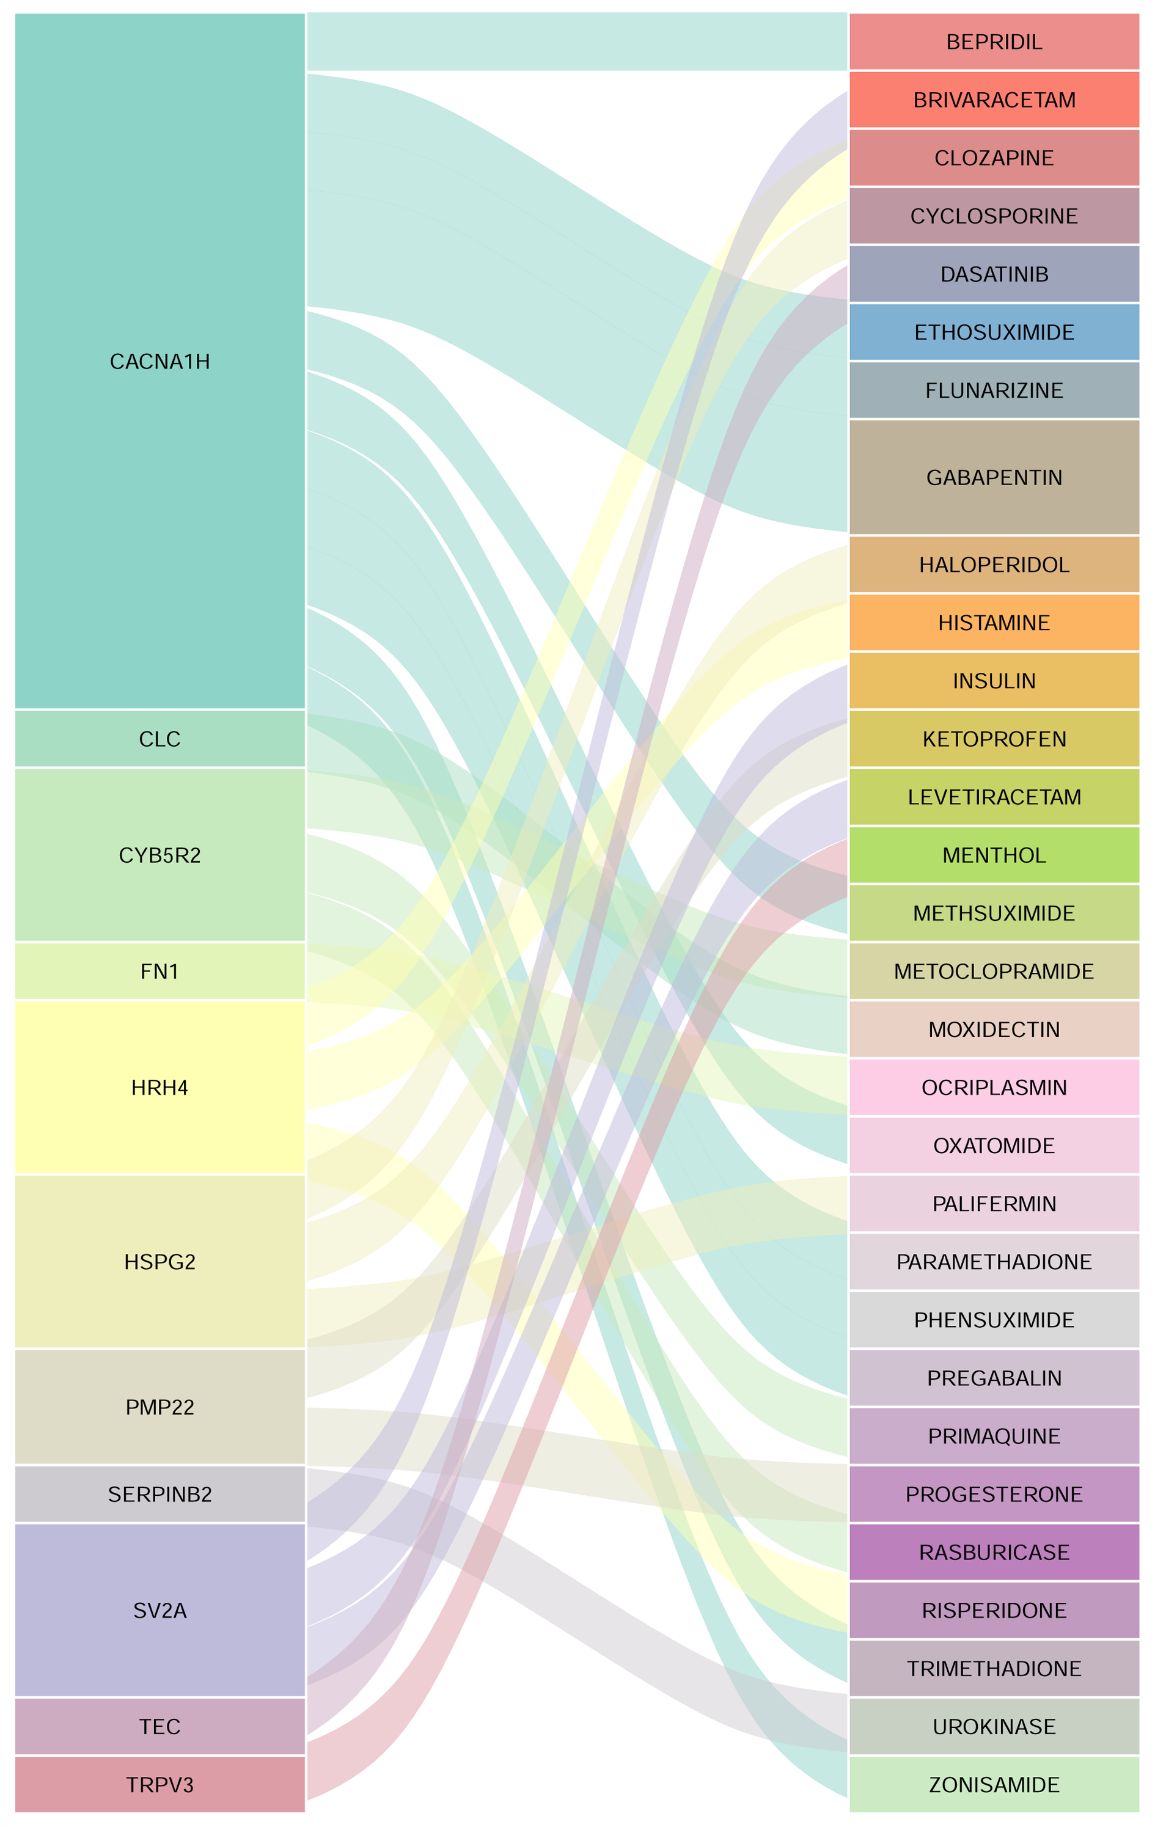
**

**Figure S2** Drug predictions of 61 DEmRNAs in CARAS.

DEmRNA, differentially expressed mRNA; CARAS, combined allergic rhinitis and asthma syndrome.
